# Supplementary material
Source: PubMed Central journal article supplement (PMC4208670)
Supplement: np500398m_si_001.pdf [file np500398m_si_001.pdf]

# Indazole-Type Alkaloids from *Nigella sativa* Seeds Exhibit

## Antihyperglycemic Effects via AMPK Activation In Vitro

Tao Yuan,<sup>†,‡</sup> Pragati Nahar,<sup>‡</sup> Meenakshi Sharma,<sup>‡</sup> Ke Liu,<sup>§</sup> Angela Slitt,<sup>‡</sup> H. A. Aisa,<sup>†</sup>  
and Navindra P. Seeram<sup>‡</sup>

<sup>†</sup> *The Key Laboratory of Plant Resources and Chemistry of Arid Zone, and State Key Laboratory Basis of Xinjiang Indigenous Medicinal Plants Resource Utilization, Xinjiang Technical Institute of Physics and Chemistry, Chinese Academy of Sciences, Urumqi 830011, People's Republic of China*

<sup>‡</sup> *Department of Biomedical and Pharmaceutical Sciences, College of Pharmacy, University of Rhode Island, Kingston, RI 02881, United States*

<sup>§</sup> *Center of Pharmacogenetics, Department of Pharmaceutical Sciences, University of Pittsburgh, Pittsburgh, PA 15261, United States*

### Supporting Information Available

#### Part 1

1. Experimental procedures of the cell viability assay.
2. Results of the cell viability assay.

#### Part 2

For Compound **1**

Figure S1. <sup>1</sup>H NMR spectrum of 17-*O*-(β-D-glucopyranosyl)-4-*O*-methylnigellidine

(**1**) in methanol-d<sub>4</sub>

Figure S2. <sup>13</sup>C NMR spectrum of 17-*O*-(β-D-glucopyranosyl)-4-*O*-methylnigellidine

(**1**) in methanol-d<sub>4</sub>

Figure S3. HSQC spectrum of 17-*O*-( $\beta$ -D-glucopyranosyl)-4-*O*-methylnigellidine (**1**) in methanol-d<sub>4</sub>

Figure S4. HMBC spectrum of 17-*O*-( $\beta$ -D-glucopyranosyl)-4-*O*-methylnigellidine (**1**) in methanol-d<sub>4</sub>

Figure S5. <sup>1</sup>H-<sup>1</sup>H COSY spectrum of 17-*O*-( $\beta$ -D-glucopyranosyl)-4-*O*-methylnigellidine (**1**) in methanol-d<sub>4</sub>

Figure S6. HRESIMS of 17-*O*-( $\beta$ -D-glucopyranosyl)-4-*O*-methylnigellidine (**1**)

For Compound **2**

Figure S7. <sup>1</sup>H NMR spectrum of nigelanoid (**2**) in methanol-d<sub>4</sub>

Figure S8. <sup>13</sup>C NMR spectrum of nigelanoid (**2**) in methanol-d<sub>4</sub>

Figure S9. HSQC spectrum of nigelanoid (**2**) in methanol-d<sub>4</sub>

Figure S10. HMBC spectrum of nigelanoid (**2**) in methanol-d<sub>4</sub>

Figure S11. <sup>1</sup>H-<sup>1</sup>H COSY spectrum of nigelanoid (**2**) in methanol-d<sub>4</sub>

Figure S12. HRESIMS of nigelanoid (**2**)

Figure S13. CD spectrum of nigelanoid (**2**) in methanol-d<sub>4</sub>

## Part 1

### 1. Experimental procedures of cell viability assay

The viability of HepG2 cells after 24 h of continuous exposure to the test compounds was determined by performing colorimetric MTS [3-(4,5-dimethylthiazol-2-yl)-5-(3-carboxymeth-oxyphenyl)-2-(4-sulphenyl)-2H-tetrazolium salt] assay (Promega, Madison, CA, USA) according to the protocol described previously. Briefly, after 24 h of treatment, 20  $\mu$ L of MTS reagent was added to each reaction well (in a 96-well format). After 2 h of incubation, the absorbance was measured at 490 nm using a spectrophotometer (SpectraMax M2, Molecular Devices Corp, Sunnyvale, CA, USA).

### 2. Results of the cell viability assay

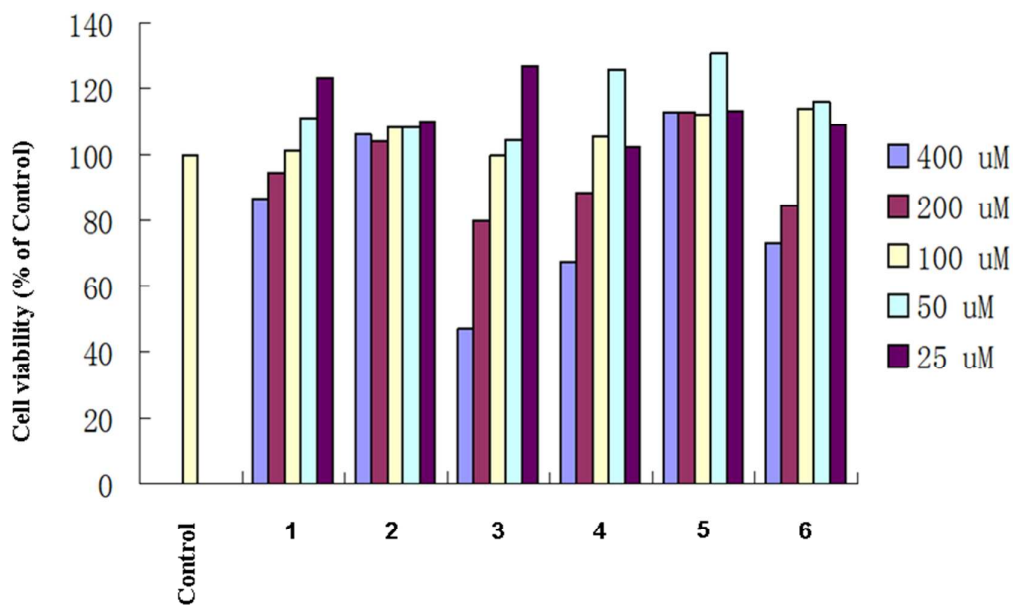

## Part 2

Figure S1.  $^1\text{H}$  NMR spectrum of compound **1**

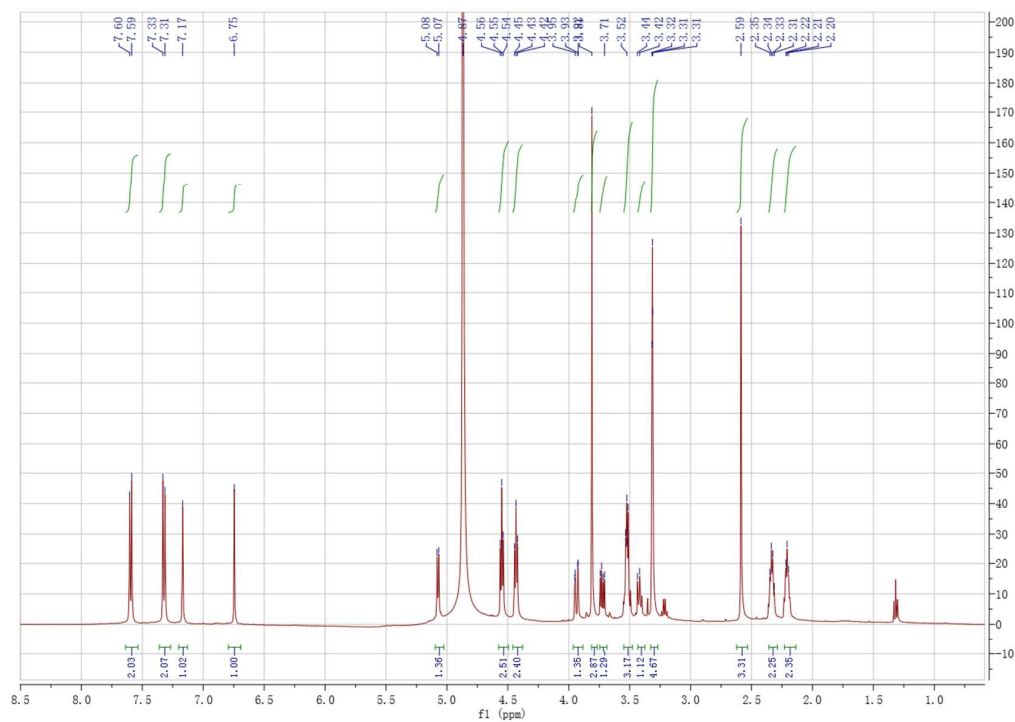

Figure S2.  $^{13}\text{C}$  NMR spectrum of compound **1**

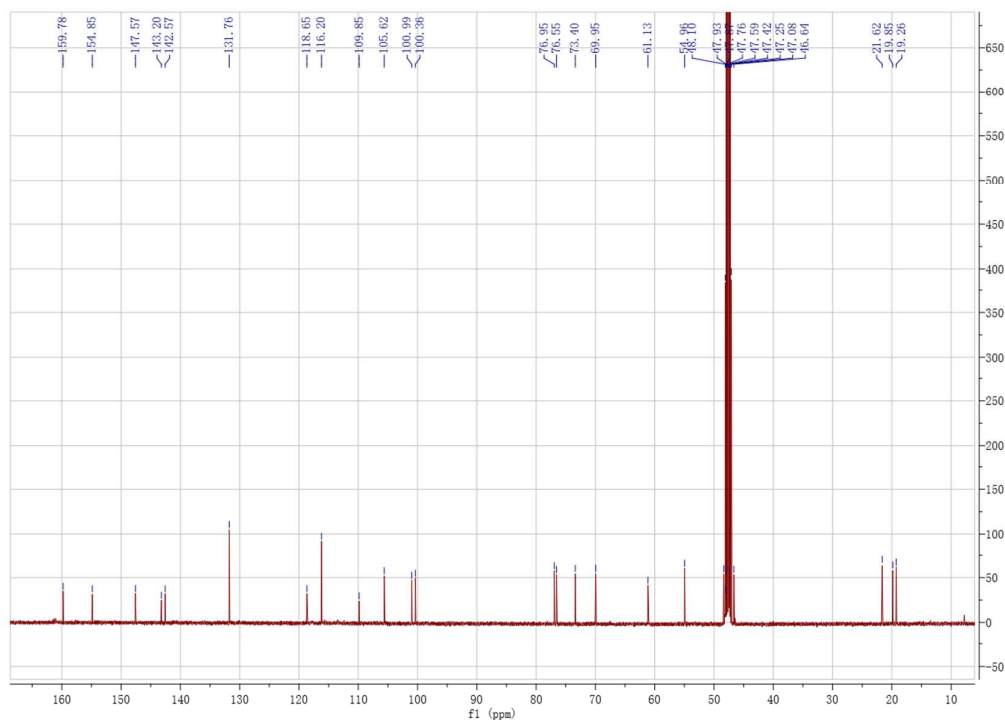

Figure S3. HSQC spectrum of compound **1**

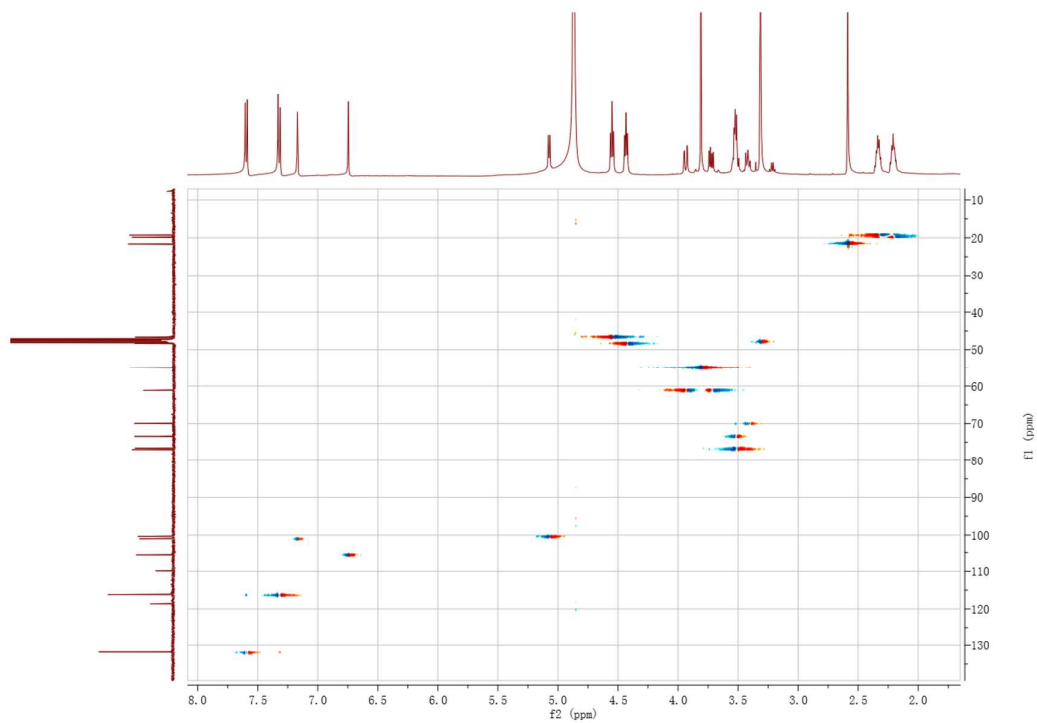

Figure S4. HMBC spectrum of compound **1**

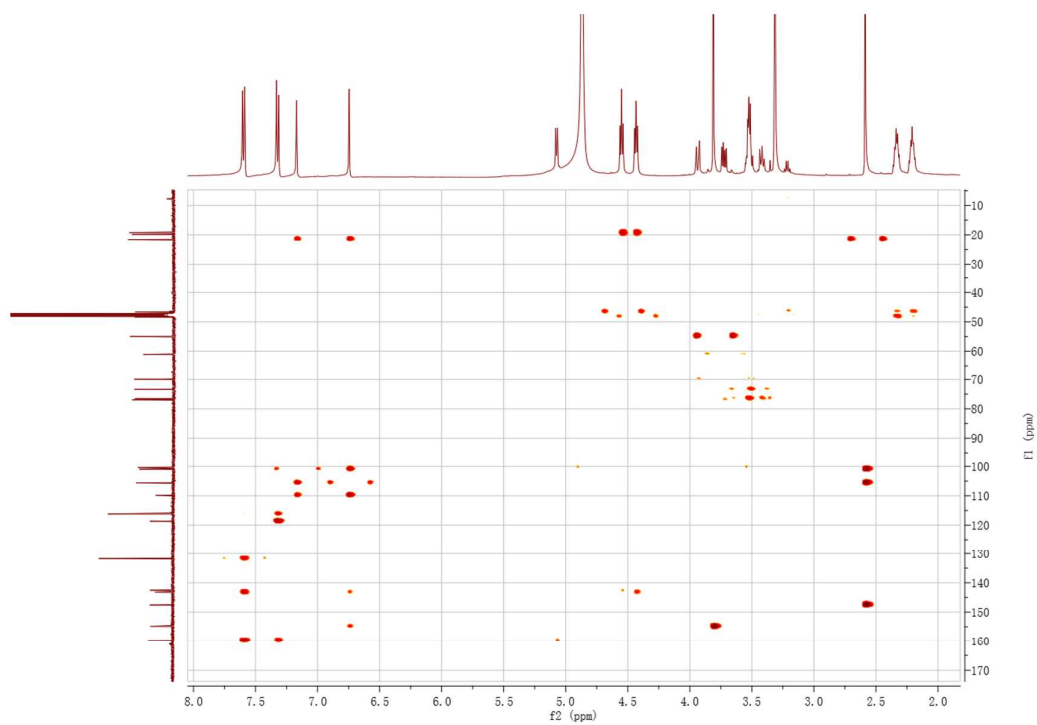

Figure S5.  $^1\text{H}$ - $^1\text{H}$  COSY spectrum of compound **1**

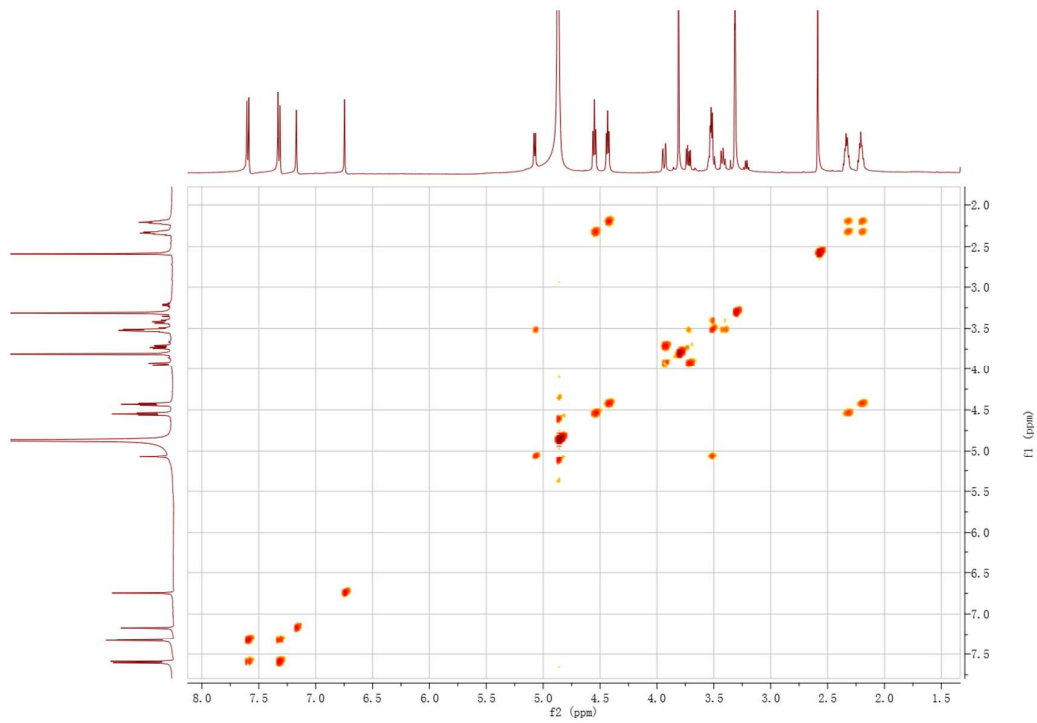

Figure S6. HRESIMS of compound **1**

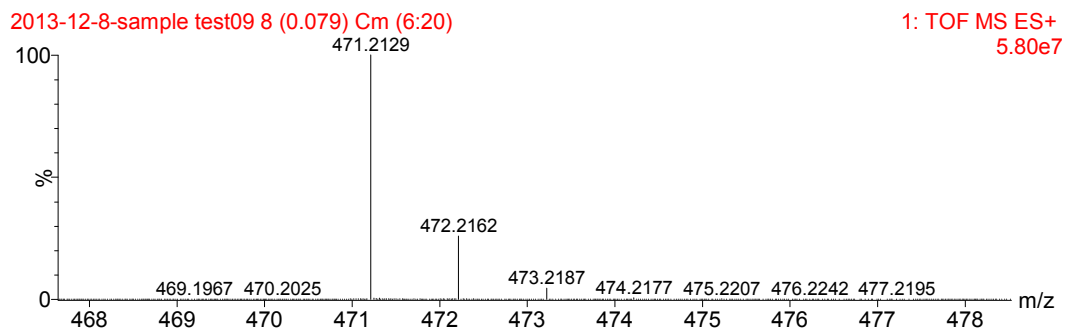

Figure S7.  $^1\text{H}$  NMR spectrum of compound **2**

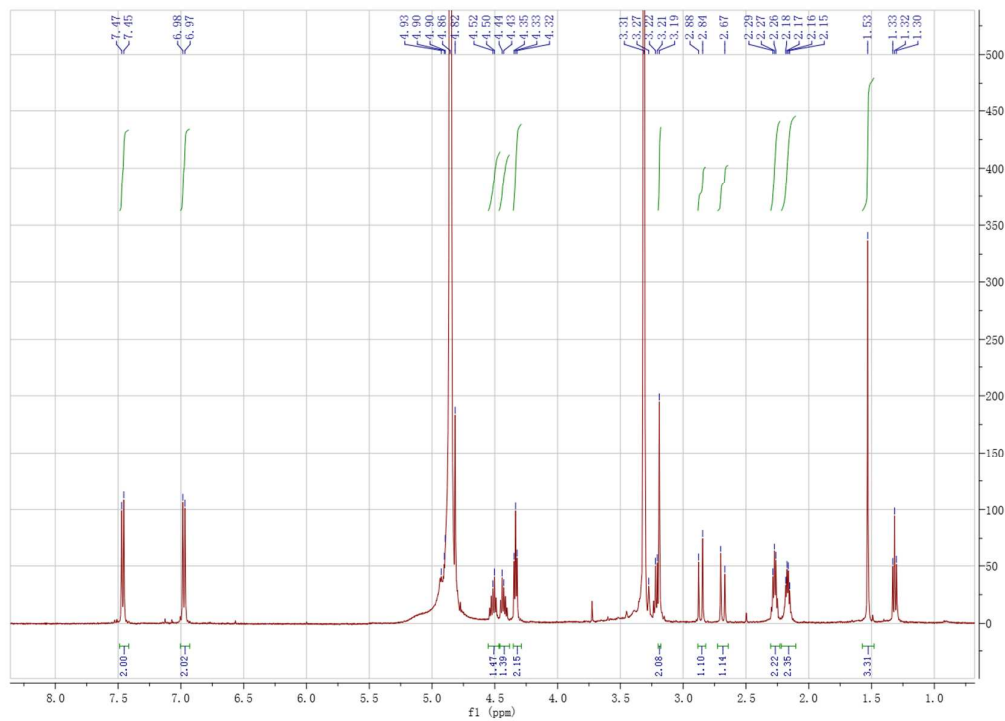

Figure S8.  $^{13}\text{C}$  NMR spectrum of compound **2**

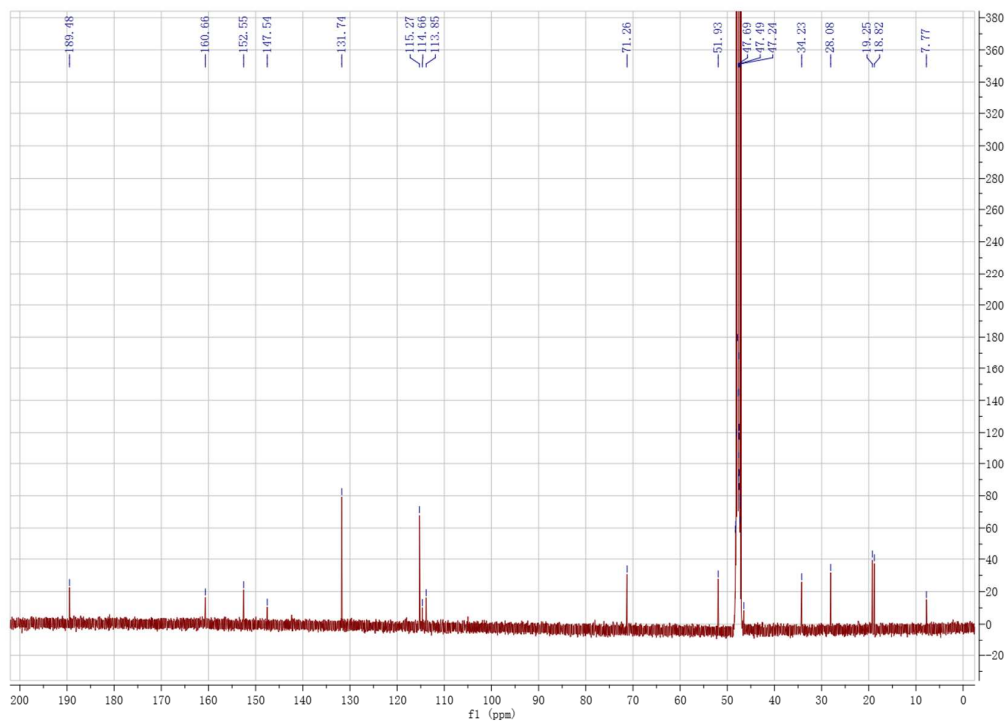

Figure S9. HSQC spectrum of compound 2

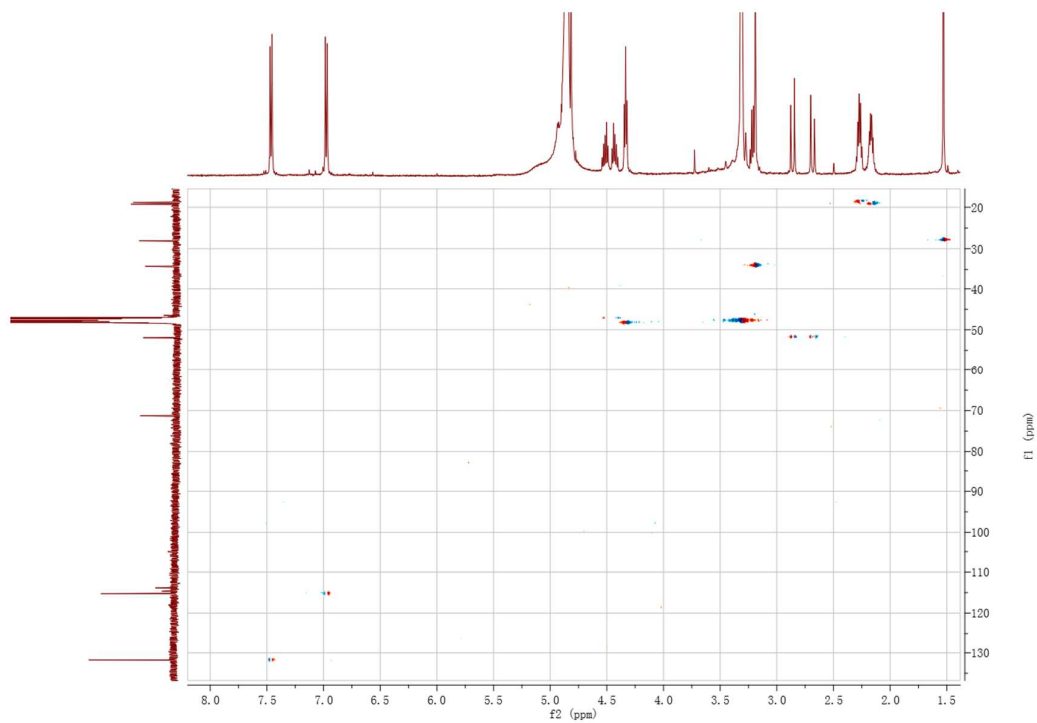

Figure S10. HMBC spectrum of compound 2

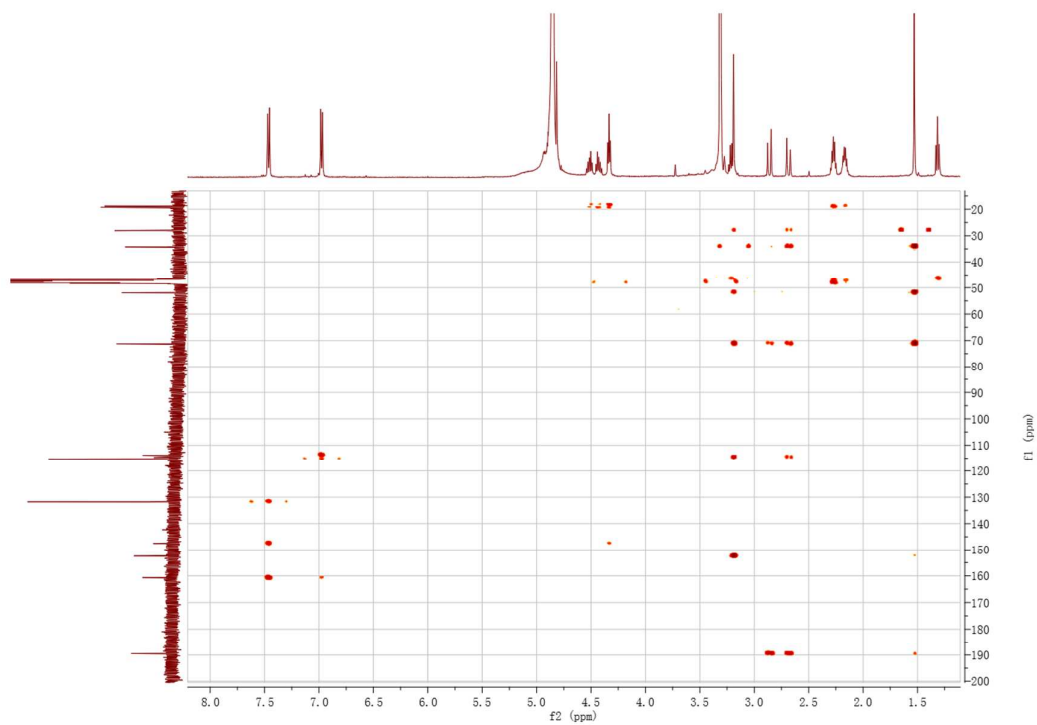



Figure S11.  $^1\text{H}$ - $^1\text{H}$  COSY spectrum of compound **2**

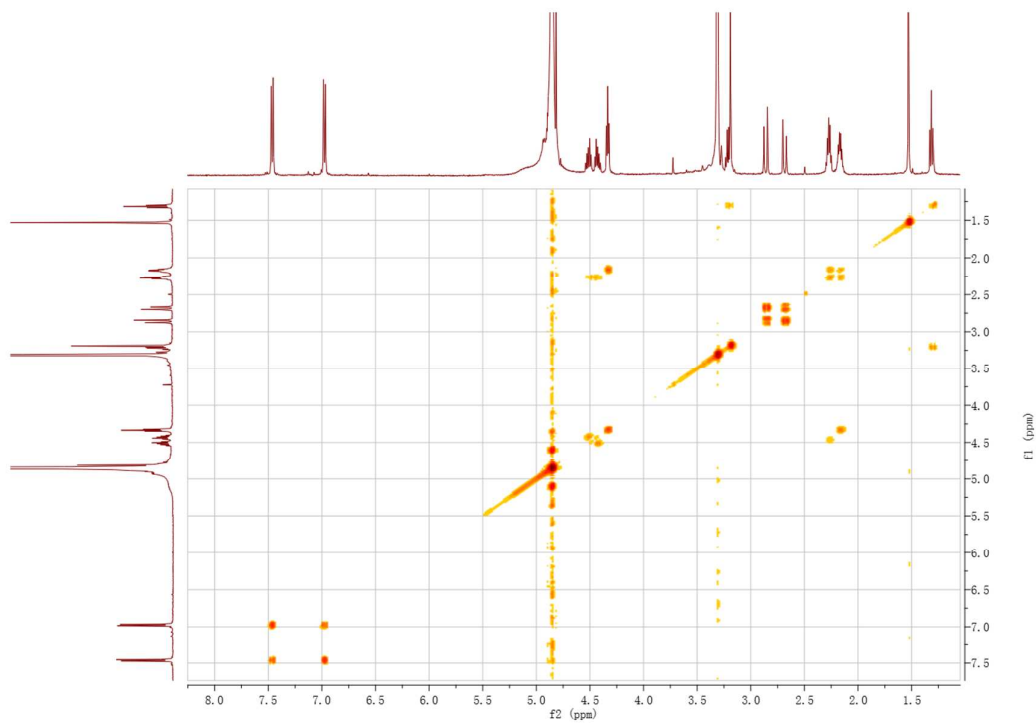

Figure S12. HRESIMS of compound **2**

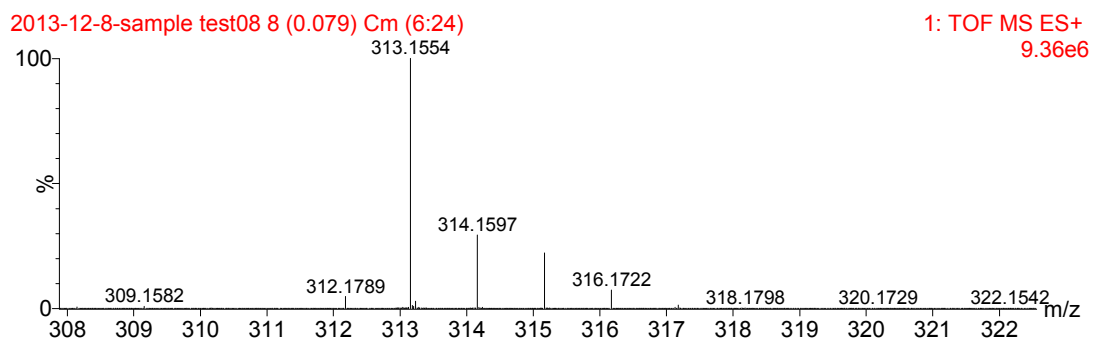

Figure S13. CD spectrum of compound 2 in methanol-d4

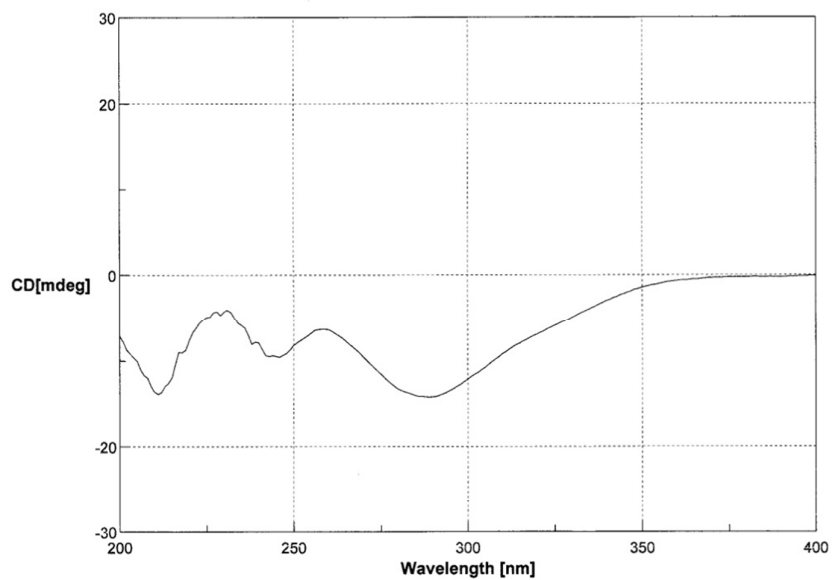

Date 8/20/2013 3:34PM  
File name Memory#4  
Model J-810  
Serial No. B024760750  
Band width 1 nm  
Response 1 sec  
Sensitivity Standard  
Measurement range 400 - 200 nm  
Data pitch 1nm  
Scanning speed 100 nm/min  
Accumulation 3  
Cell Length 1 cm  
Temperature 25 C  
Sample name TY-1  
Operator TAO  
Comment

Memory#4
